# Supplementary material for: Silver nanocube dimer nanojunctions as plasmon-enhanced Raman sensors
Source: Royal Society of Chemistry journal article supplement (doi:10.1039/d2tc03329a), 2022-01-01
Supplement: d2tc03329a1.pdf [file d2tc03329a1.pdf]

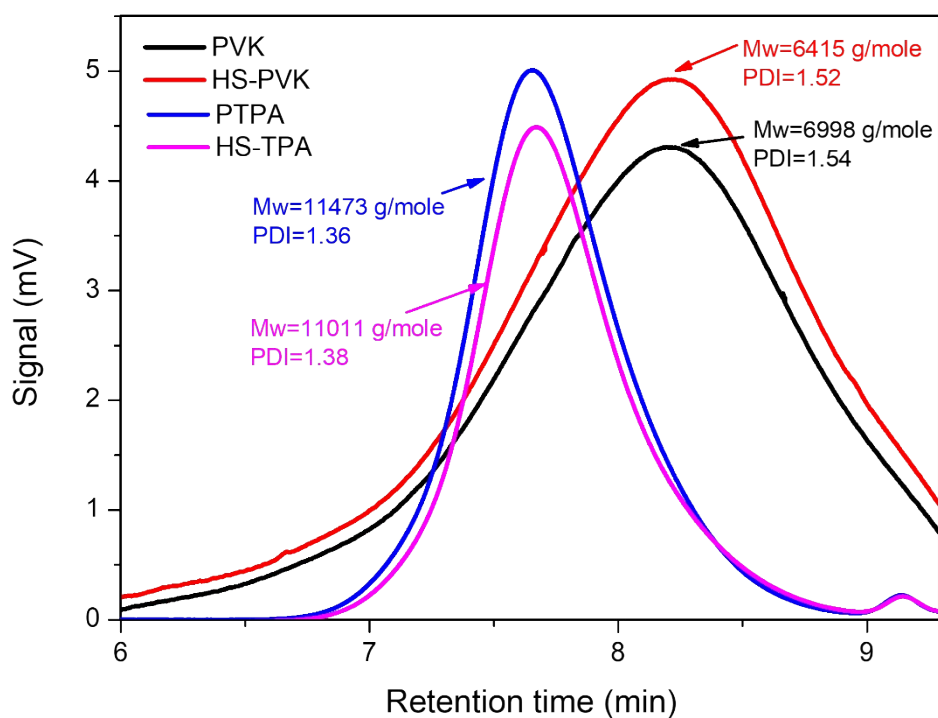

**S1 The molecular weight and PDI of polymers used as ligands on AgNC and polymer matrices for the fabrication of dimer nanojunctions nanocomposite.** Black curve: PVK as polymer matrix; red curve: HS-PVK as ligand; blue curve: PTPA as polymer matrix; and purple curve: HS-TPA as ligand.

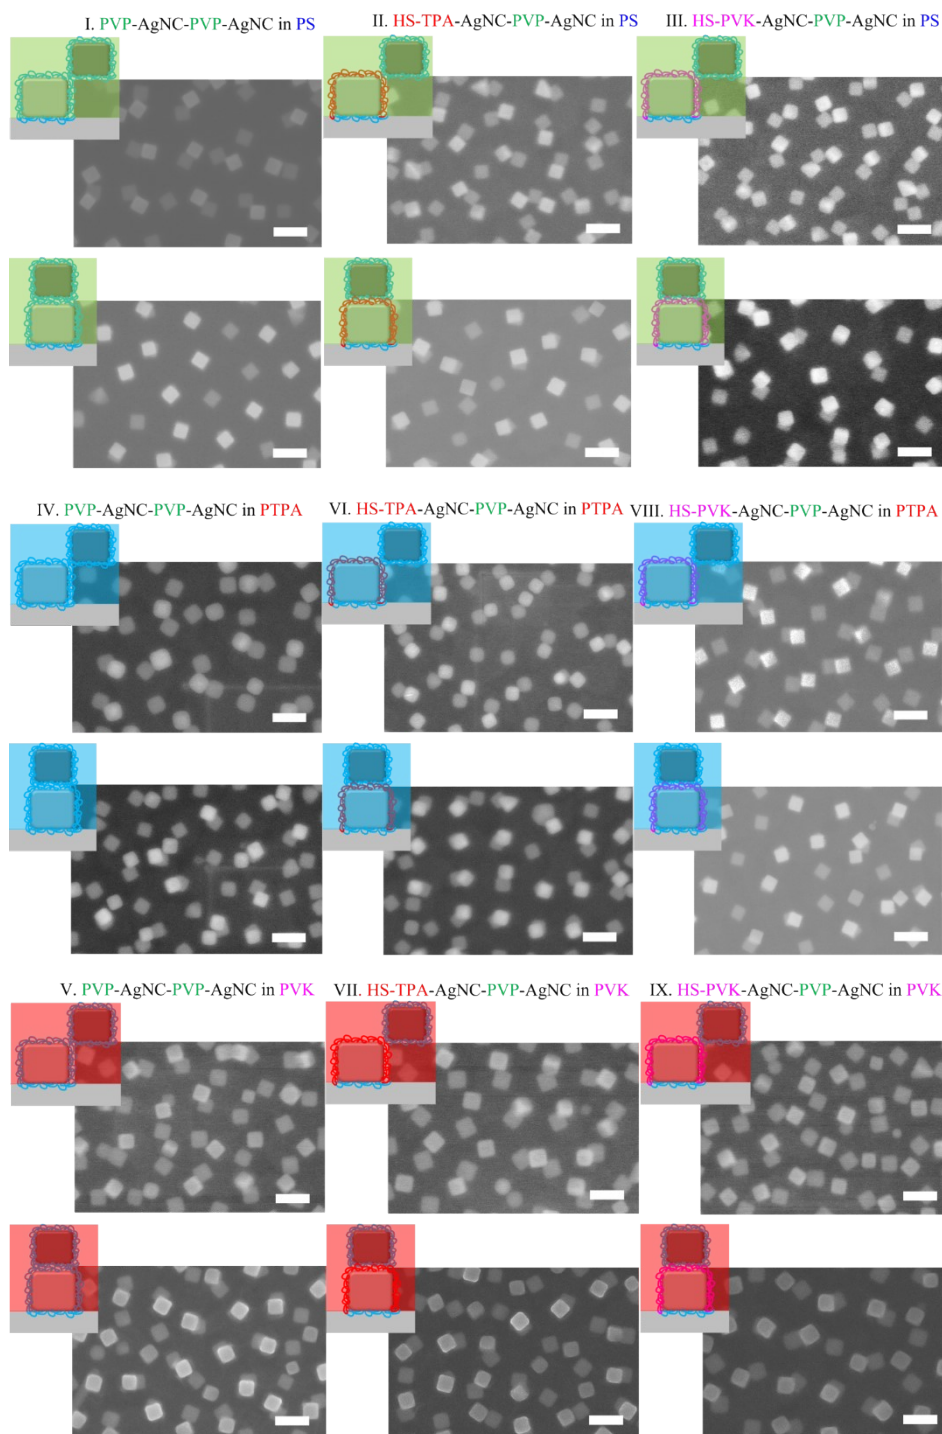

**S2 The dimer conformations, horizontal dimers and vertical dimers, were formed in different nanocomposites.** (A) the nanocomposites consisted of PVP, HS-poly-*p*-TPA, or HS-PVK coated AgNC and PS matrix. (B) the nanocomposites consisted of PVP, HS-poly-*p*-TPA, or HS-PVK coated AgNC and PTPA matrix. (C) the nanocomposites consisted of PVP, HS-poly-*p*-TPA, or HS-PVK coated AgNC and PVK matrix. The overlapping area is used to distinguish the two dimer nanojunctions. For vertical dimer nanojunctions, the overlapping area of dimer nanojunctions is greater than 50% of the projected area of AgNC. For horizontal dimer nanojunctions, the overlapping area of dimer nanojunctions is less than 50% of the projected area of AgNC. And all samples were measured by > 150 dimer nanojunctions, and the configurations of dimer nanojunctions were named by the majority in the statistical analysis results.

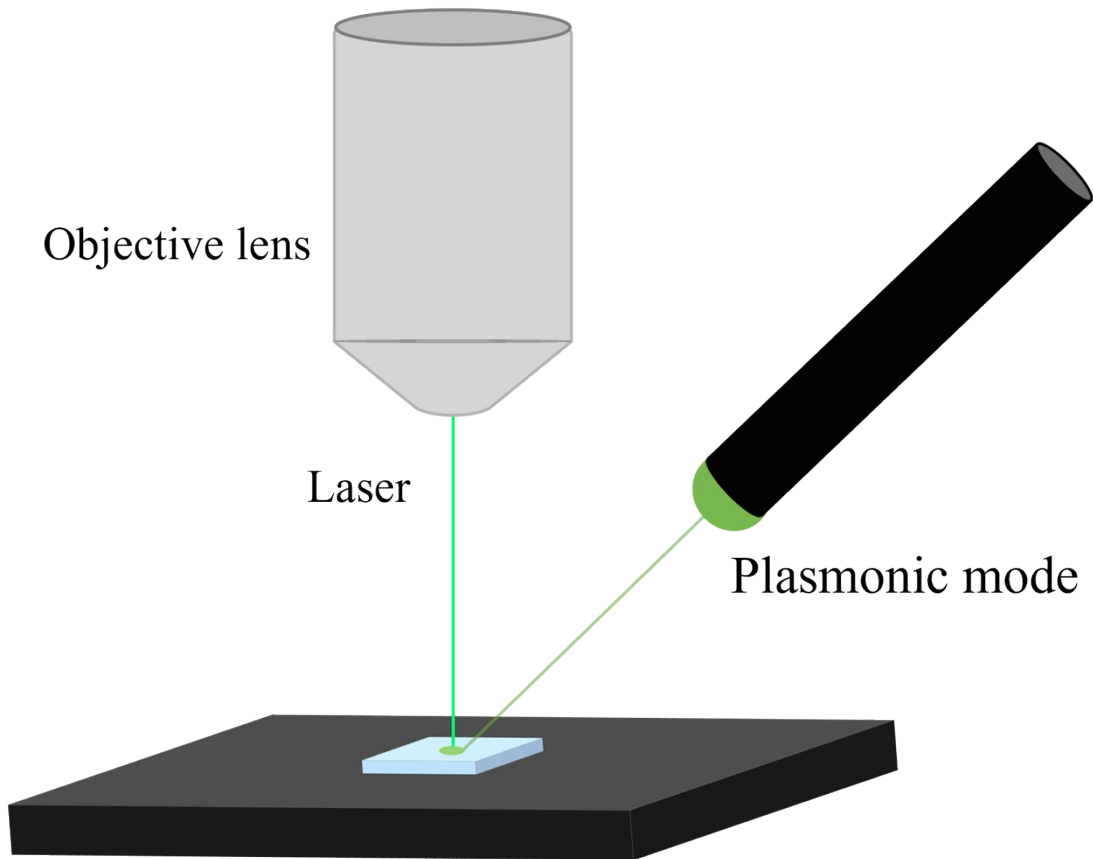

**S3 Experimental set up for measurement of Raman spectrum of different dimer nanojunctions under the plasmon-induced electromagnetic field.** The laser power for measurement of the Raman spectrum was kept constant and the intensities of irradiation light were tuned for creating the different strengths of the electromagnetic field around dimer nanojunctions. A diode-pumped laser was used as the excitation source (532 nm) and the laser power was maintained at 2.5 mW for all spectral acquisitions. The spectra were collected using 20 scans and the duration of each scan was 1 second. And the point source of purple irradiation (LED source) was used as an external stimulus to excite the plasmon-induced electromagnetic field ( $I_0 = 2.475$  W).

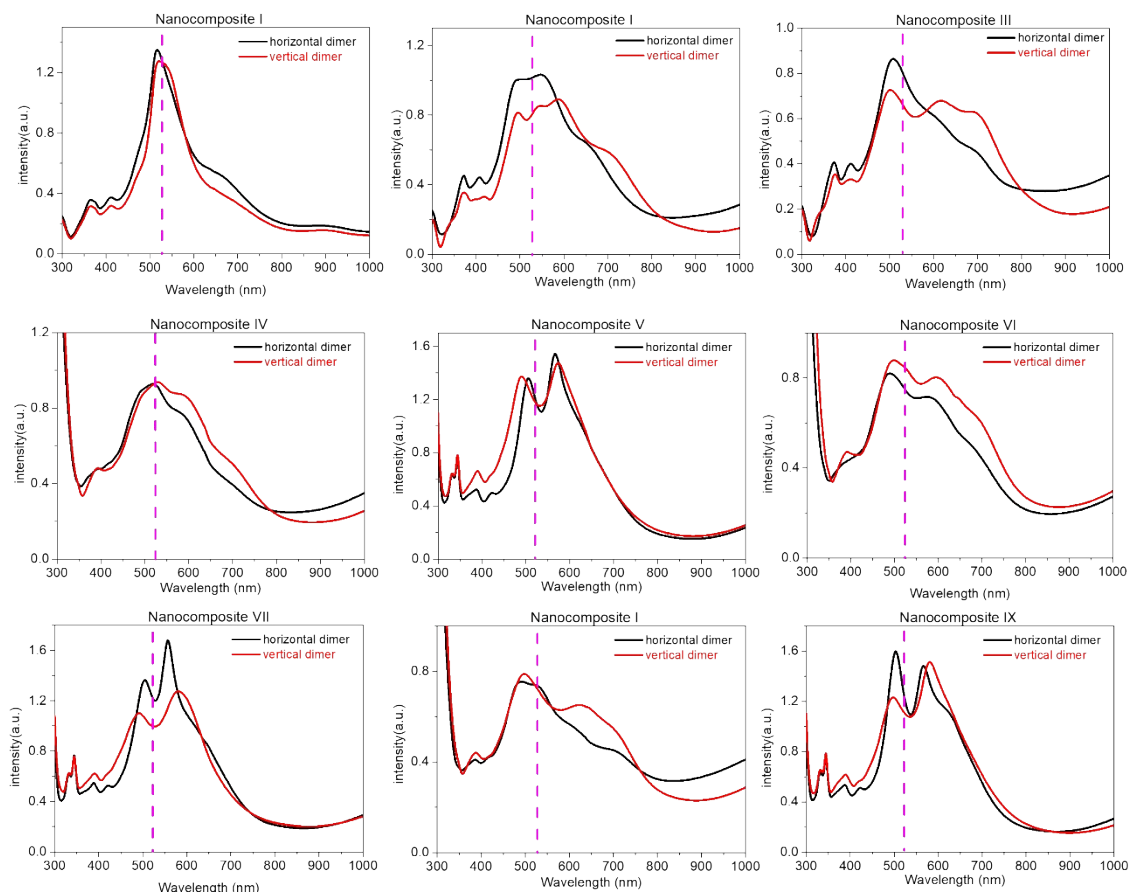

**S4 Extinction spectra of horizontal and vertical dimer nanojunctions in nine different nanocomposites.** The black solid curves were the extinction spectra of horizontal dimer nanojunctions in nanocomposites (nanocomposite I to IX) composed of different ligands coated AgNC and different polymer matrices. The red solid curves were the extinction spectra of vertical dimer nanojunctions in nanocomposites (nanocomposite I to IX) composed of different ligands coated AgNC and different polymer matrices. The purple dashed lines corresponding to the irradiation wavelength triggered the plasmon-induced electromagnetic field. The extinction spectra of the dimer nanojunctions in nanocomposites at wavelengths below 350nm are caused by scattering or absorption from the rough edges of the glass substrate, which are negligible.

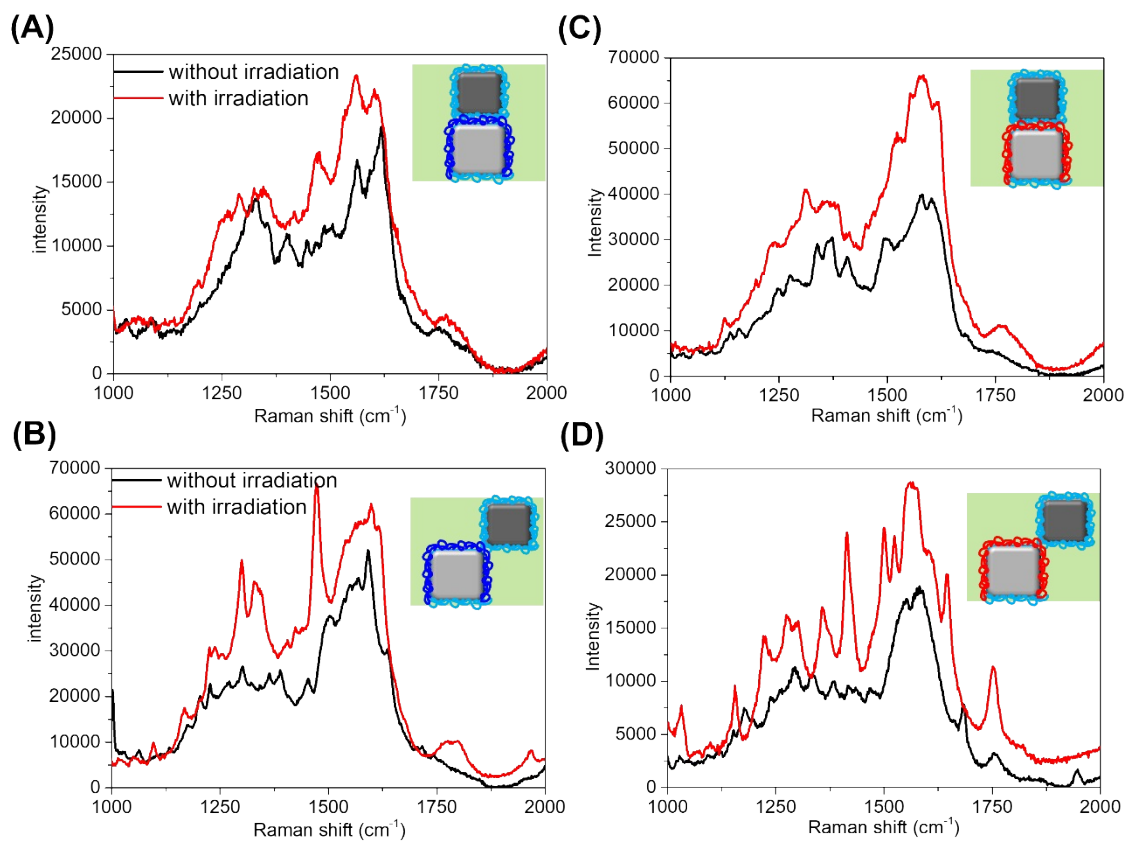

**S5 Raman spectra of dimer nanojunctions in different nanocomposites.** (A) The vertical dimer nanojunctions consisted of HS-poly-*p*-TPA coated AgNCs and PS matrix. (B) The horizontal dimer nanojunctions consisted of HS-poly-*p*-TPA coated AgNCs and PS matrix. (C) The vertical dimer nanojunctions consisted of HS-PVK coated AgNCs and PS matrix. (D) The horizontal dimer nanojunctions consisted of HS-PVK coated AgNCs and PS matrix.

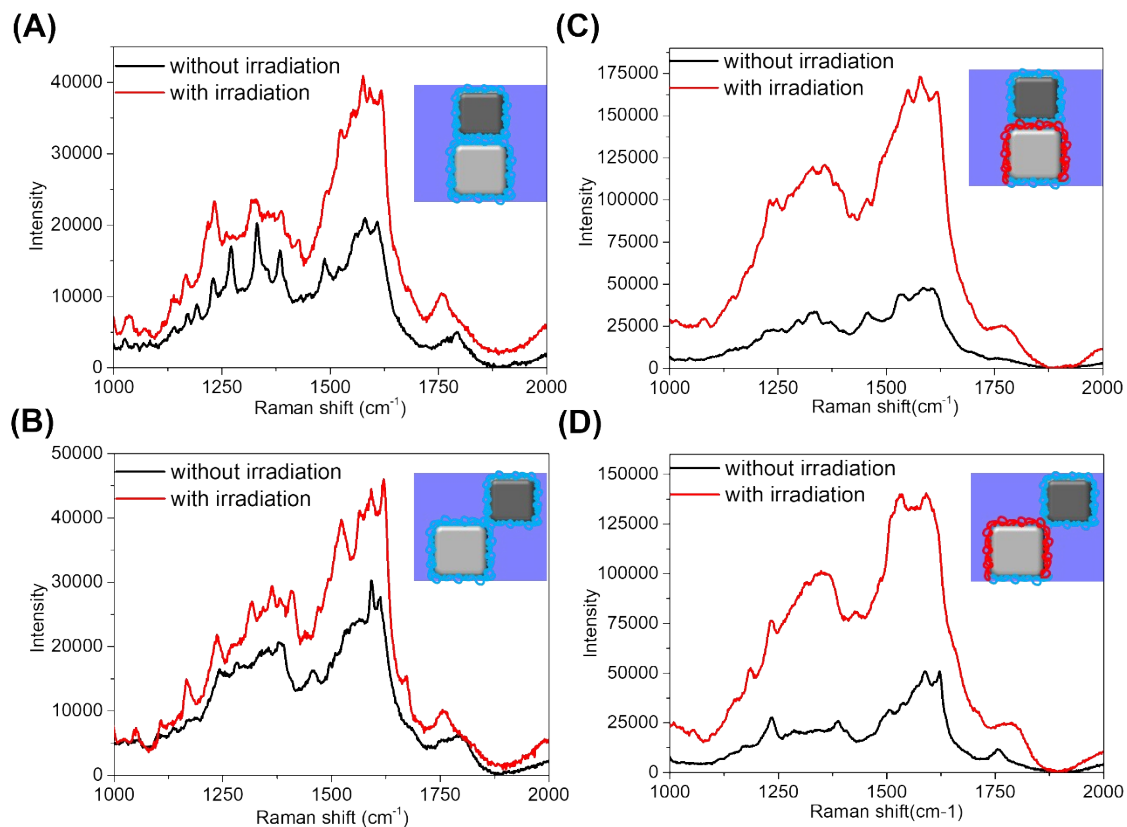

**S6 Raman spectra of dimer nanojunctions in different nanocomposites.** (A) The vertical dimer nanojunctions consisted of PVP-coated AgNCs and PTPA matrix. (B) The horizontal dimer nanojunctions consisted of PVP-coated AgNCs and PTPA matrix. (C) The vertical dimer nanojunctions consisted of HS-PVK coated AgNCs and PTPA matrix. (D) The horizontal dimer nanojunctions consisted of HS-PVK coated AgNCs and PTPA matrix.

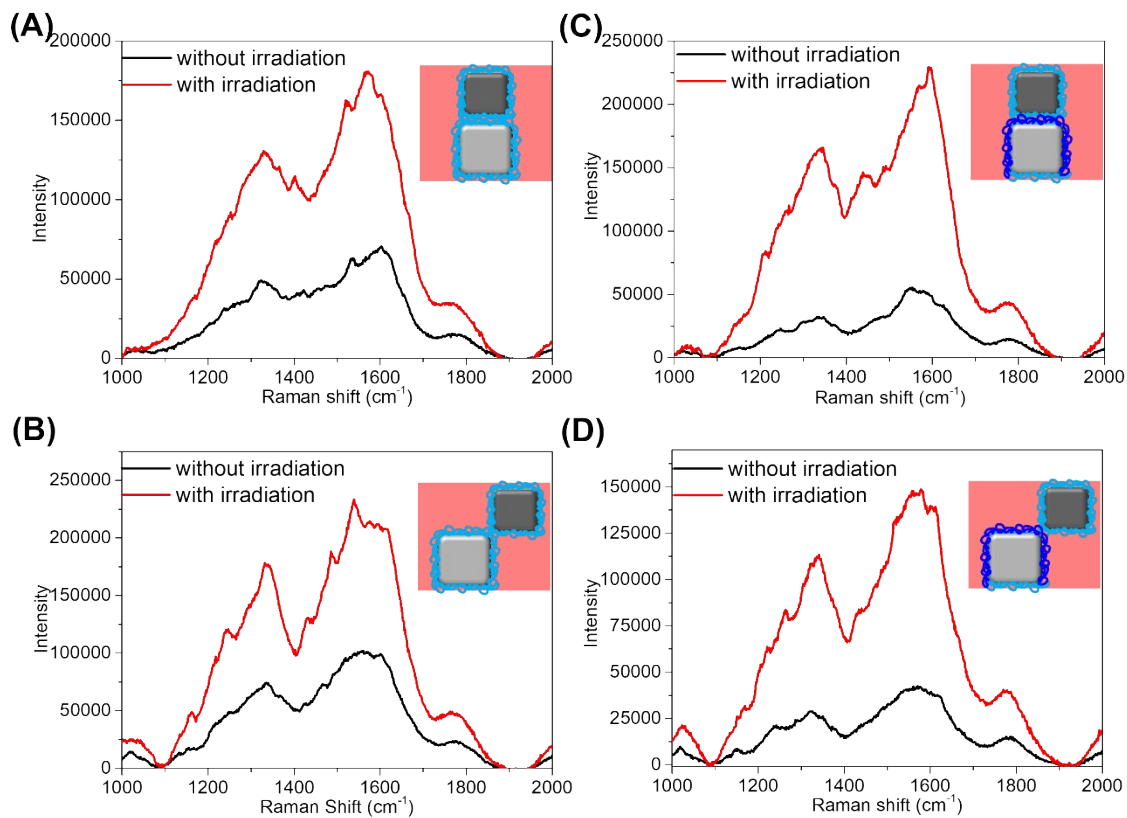

**S7 Raman spectra of dimer nanojunctions in different nanocomposites.** (A) The vertical dimer nanojunctions consisted of PVP-coated AgNCs and PVK matrix. (B) The horizontal dimer nanojunctions consisted of PVP-coated AgNCs and PVK matrix. (C) The vertical dimer nanojunctions consisted of HS-poly-*p*-TPA coated AgNCs and PVK matrix. (D) The horizontal dimer nanojunctions consisted of HS-poly-*p*-TPA coated AgNCs and PVK matrix.

TableS1 Enhancement factor of chemical vibration modes of PVP, PS, PTPA, and PVK in Raman spectra

| Bottom layer-Top layer in Matrix    | Dimer      | polymer | Enhancement factor (%) | Error bar |
|-------------------------------------|------------|---------|------------------------|-----------|
| I : PVP-AgNC-PVP-AgNC in PS         | horizontal | PVP     | 0.11                   | 2.444     |
|                                     |            | PS      | 1.77                   | 3.185     |
|                                     | vertical   | PVP     | -2.73                  | 2.488     |
|                                     |            | PS      | -3.49                  | 2.583     |
| II : HS-TPA-AgNC-PVP-AgNC in PS     | horizontal | PVP     | 29.01                  | 10.204    |
|                                     |            | PS      | 56.03                  | 19.466    |
|                                     |            | PTPA    | 27.09                  | 11.549    |
|                                     | vertical   | PVP     | 42.60                  | 3.646     |
|                                     |            | PS      | 17.07                  | 8.340     |
|                                     |            | PTPA    | 43.69                  | 14.464    |
| III : HS-PVK-AgNC-PVP-AgNC in PS    | horizontal | PVP     | 58.46                  | 36.565    |
|                                     |            | PS      | 78.70                  | 2.262     |
|                                     |            | PVK     | 43.47                  | 10.117    |
|                                     | vertical   | PVP     | 72.62                  | 9.137     |
|                                     |            | PS      | 44.16                  | 15.772    |
|                                     |            | PVK     | 62.72                  | 10.379    |
| IV : PVP-AgNC-PVP-AgNC in PTPA      | horizontal | PVP     | 64.68                  | 33.495    |
|                                     |            | PTPA    | 74.84                  | 4.971     |
|                                     | vertical   | PVP     | 99.83                  | 3.997     |
|                                     |            | PTPA    | 56.31                  | 8.245     |
| V : PVP-AgNC-PVP-AgNC in PVK        | horizontal | PVP     | 126.11                 | 4.648     |
|                                     |            | PVK     | 135.02                 | 13.014    |
|                                     | vertical   | PVP     | 177.19                 | 18.810    |
|                                     |            | PVK     | 164.83                 | 21.833    |
| VI : HS-TPA-AgNC-PVP-AgNC in PTPA   | horizontal | PVP     | 152.35                 | 5.510     |
|                                     |            | PTPA    | 173.39                 | 2.046     |
|                                     | vertical   | PVP     | 251.24                 | 26.194    |
|                                     |            | PTPA    | 216.43                 | 16.248    |
| VII : HS-TPA-AgNC-PVP-AgNC in PVK   | horizontal | PVP     | 206.11                 | 16.379    |
|                                     |            | PTPA    | 273.36                 | 24.502    |
|                                     |            | PVK     | 199.42                 | 14.726    |
|                                     | vertical   | PVP     | 301.51                 | 36.123    |
|                                     |            | PTPA    | 245.15                 | 22.631    |
|                                     |            | PVK     | 286.33                 | 24.001    |
| VIII : HS-PVK-AgNC-PVP-AgNC in PTPA | horizontal | PVP     | 239.38                 | 4.438     |
|                                     |            | PTPA    | 239.26                 | 6.377     |
|                                     |            | PVK     | 289.37                 | 23.482    |
|                                     | vertical   | PVP     | 352.97                 | 9.059     |
|                                     |            | PTPA    | 372.54                 | 29.524    |
|                                     |            | PVK     | 319.44                 | 22.365    |
| IX : HS-PVK-AgNC-PVP-AgNC in PVK    | horizontal | PVP     | 452.52                 | 18.200    |
|                                     |            | PVK     | 484.36                 | 13.394    |
|                                     | vertical   | PVP     | 519.94                 | 25.816    |
|                                     |            | PVK     | 475.50                 | 25.799    |

$$\frac{I_{PIEF} - I_{NoN - PIEF}}{I_{NoN - PIEF}}$$

PS: Enhancement factor =  $\frac{I_{PIEF} - I_{NoN - PIEF}}{I_{NoN - PIEF}}$

$I_{PIEF}$ : the mean intensity of Raman signals of the analyte under the plasmon-induced electromagnetic field

$I_{NoN - PIEF}$ : the mean intensity of Raman signals of the analyte without the plasmon-induced electromagnetic field



TableS2 Enhancement factor of chemical vibration modes of PVP and PS in Raman spectra

| Bottom layer-Top layer in Matrix            | Power (%) | polymer | enhancement factor(%) | Error bar |
|---------------------------------------------|-----------|---------|-----------------------|-----------|
| I : PVP-AgNC-PVP-AgNC in PS<br>(horizontal) | 0         | PVP     | 0                     | 1.00E-07  |
|                                             |           | PS      | 0                     | 1.00E-07  |
|                                             | 25        | PVP     | 0.02                  | 0.838     |
|                                             |           | PS      | 0.99                  | 2.498     |
|                                             | 50        | PVP     | -2.35                 | 3.862     |
|                                             |           | PS      | 0.17                  | 0.639     |
|                                             | 75        | PVP     | -2.34                 | 3.285     |
|                                             |           | PS      | 1.64                  | 1.822     |
| 100                                         | PVP       | 0.11    | 2.445                 |           |
|                                             | PS        | 1.77    | 3.185                 |           |
| II : PVP-AgNC-PVP-AgNC in PS<br>(vertical)  | 0         | PVP     | 0                     | 1.00E-07  |
|                                             |           | PS      | 0                     | 1.00E-07  |
|                                             | 25        | PVP     | -3.54                 | 2.667     |
|                                             |           | PS      | -5.92                 | 3.046     |
|                                             | 50        | PVP     | -3.15                 | 1.134     |
|                                             |           | PS      | -1.50                 | 4.989     |
|                                             | 75        | PVP     | -4.41                 | 0.464     |
|                                             |           | PS      | -1.54                 | 2.323     |
| 100                                         | PVP       | -2.73   | 2.488                 |           |
|                                             | PS        | -3.49   | 2.583                 |           |

Table S3 Enhancement factor of chemical vibration modes of PVP and PTPA in Raman spectra

| Bottom layer-Top layer in Matrix                                           | Power (%) | polymer | Enhancement factor(%) | Error bar |
|----------------------------------------------------------------------------|-----------|---------|-----------------------|-----------|
| III : <b>SH-TPA</b> -AgNC- <b>PVP</b> -AgNC in <b>PTPA</b><br>(horizontal) | 0         | PVP     | 0                     | 1.00E-07  |
|                                                                            |           | PTPA    | 0                     | 1.00E-07  |
|                                                                            | 25        | PVP     | 34.00                 | 7.796     |
|                                                                            |           | PTPA    | 38.41                 | 6.704     |
|                                                                            | 50        | PVP     | 72.64                 | 1.753     |
|                                                                            |           | PTPA    | 89.36                 | 3.145     |
|                                                                            | 75        | PVP     | 112.18                | 4.813     |
|                                                                            |           | PTPA    | 145.12                | 7.272     |
| 100                                                                        | PVP       | 152.35  | 5.510                 |           |
|                                                                            | PTPA      | 216.43  | 16.248                |           |
| IV : <b>SH-TPA</b> -AgNC- <b>PVP</b> -AgNC in <b>PTPA</b><br>(vertical)    | 0         | PVP     | 0                     | 1.00E-07  |
|                                                                            |           | PTPA    | 0                     | 1.00E-07  |
|                                                                            | 25        | PVP     | 45.99                 | 12.376    |
|                                                                            |           | PTPA    | 50.00                 | 0.642     |
|                                                                            | 50        | PVP     | 94.88                 | 21.240    |
|                                                                            |           | PTPA    | 81.59                 | 0.384     |
|                                                                            | 75        | PVP     | 151.34                | 13.349    |
|                                                                            |           | PTPA    | 132.20                | 2.883     |
| 100                                                                        | PVP       | 251.24  | 26.194                |           |
|                                                                            | PTPA      | 173.39  | 2.046                 |           |

Table S4 Enhancement factor of chemical vibration modes of PVP and PVK in Raman spectra

| Bottom layer-Top layer in Matrix                | Power (%) | polymer | Enhancement factor(%) | Error bar |
|-------------------------------------------------|-----------|---------|-----------------------|-----------|
| V : SH-PVK-AgNC-PVP-AgNC in PVK<br>(horizontal) | 0         | PVP     | 0                     | 1.00E-07  |
|                                                 |           | PVK     | 0                     | 1.00E-07  |
|                                                 | 25        | PVP     | 53.67                 | 12.477    |
|                                                 |           | PVK     | 63.14                 | 5.707     |
|                                                 | 50        | PVP     | 216.07                | 15.020    |
|                                                 |           | PVK     | 266.80                | 10.214    |
|                                                 | 75        | PVP     | 348.15                | 13.213    |
|                                                 |           | PVK     | 379.85                | 36.343    |
| 100                                             | PVP       | 452.52  | 18.201                |           |
|                                                 | PVK       | 484.36  | 13.394                |           |
| VI : SH-PVK-AgNC-PVP-AgNC in PVK<br>(vertical)  | 0         | PVP     | 0                     | 1.00E-07  |
|                                                 |           | PVK     | 0                     | 1.00E-07  |
|                                                 | 25        | PVP     | 89.61                 | 2.639     |
|                                                 |           | PVK     | 73.22                 | 7.190     |
|                                                 | 50        | PVP     | 222.57                | 16.133    |
|                                                 |           | PVK     | 162.43                | 37.816    |
|                                                 | 75        | PVP     | 379.03                | 35.142    |
|                                                 |           | PVK     | 277.34                | 42.960    |
| 100                                             | PVP       | 519.94  | 25.816                |           |
|                                                 | PVK       | 475.50  | 25.799                |           |

Table S5 The relationship between the enhancement factor of chemical vibration mode and irradiation intensity

| Sample                                       | Fitting formula : $y=y_0+A*\exp(R_0X)$ |          |         |          |
|----------------------------------------------|----------------------------------------|----------|---------|----------|
|                                              | $Y_0$                                  | A        | $R_0$   | R-square |
| PVP-AgNC-PVP-AgNC in PS<br>(horizontal)      | -3.51E-15                              | 3.50E-18 | 0.380   | -0.9956  |
| PVP-AgNC-PVP-AgNC in PS<br>(vertical)        | -4.17                                  | 4.17     | -1298.7 | 0.9710   |
| SH-TPA-AgNC-PVP-AgNC in PTPA<br>(horizontal) | -611.14                                | 611.14   | 0.00224 | 0.9999   |
| SH-TPA-AgNC-PVP-AgNC in PTPA<br>(vertical)   | -138.56                                | 138.56   | 0.01012 | 0.9954   |
| SH-PVK-AgNC-PVP-AgNC in PVK<br>(horizontal)  | -255.53                                | 255.53   | 0.01077 | 0.9742   |
| SH-PVK-AgNC-PVP-AgNC in PVK<br>(vertical)    | -253.75                                | 253.75   | 0.01176 | 0.9930   |

Table S6 The relationship between the enhancement factor of chemical vibration mode and irradiation intensity

| Sample                                       | Fitting formula : $y=y_0+A*\exp(R_0X)$ |        |         |          |
|----------------------------------------------|----------------------------------------|--------|---------|----------|
|                                              | $Y_0$                                  | A      | $R_0$   | R-square |
| PVP-AgNC-PVP-AgNC in PS<br>(horizontal)      | -0.35                                  | 0.19   | 0.023   | -1.7250  |
| PVP-AgNC-PVP-AgNC in PS<br>(vertical)        | -3.49                                  | 3.49   | -1223.2 | 0.5113   |
| SH-TPA-AgNC-PVP-AgNC in PTPA<br>(horizontal) | -168.84                                | 168.84 | 0.00838 | 0.9993   |
| SH-TPA-AgNC-PVP-AgNC in PTPA<br>(vertical)   | -776.60                                | 776.60 | 0.00203 | 0.9922   |
| SH-PVK-AgNC-PVP-AgNC in PVK<br>(horizontal)  | -357.13                                | 357.13 | 0.00884 | 0.9383   |
| SH-PVK-AgNC-PVP-AgNC in PVK<br>(vertical)    | -171.56                                | 171.56 | 0.01332 | 0.9971   |

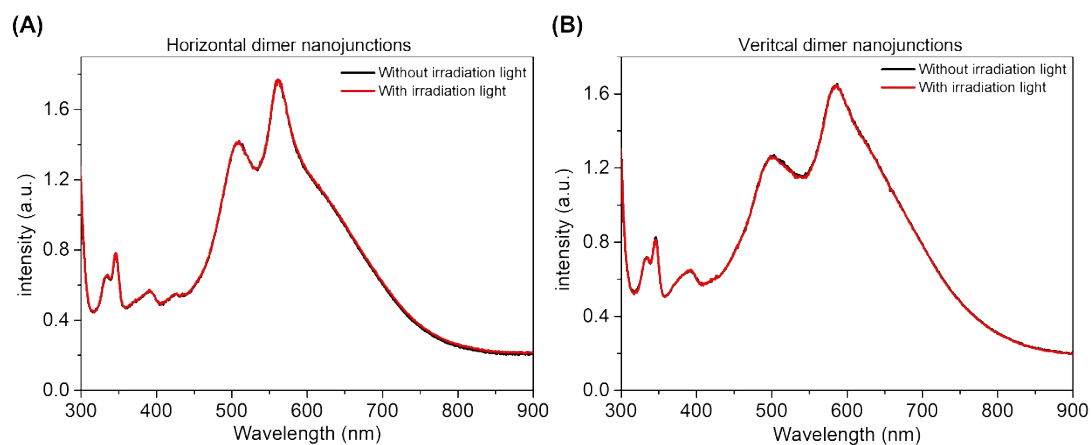

**S8 Extinction spectra of HS-PVPK coated AgNC-PVP coated AgNC in PVK matrix with and without plasmon-induced electromagnetic field.** The plasmonic response of horizontal and vertical dimer nanojunctions exhibited no significant change under the plasmon-induced electromagnetic field, as shown in (A) and (B), respectively.

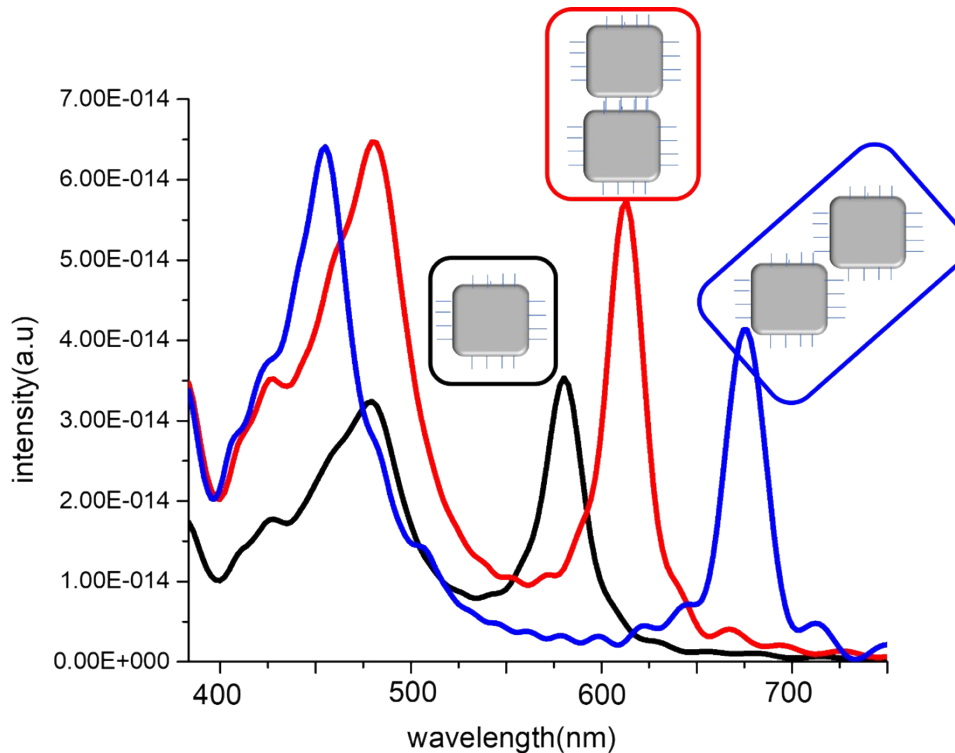

**S9 Simulation of extinction spectra:** An individual AgNC on the glass substrate (black curve); vertical dimer nanojunction on the glass substrate (red curve); and horizontal dimer nanojunction on the glass substrate (blue curve).

PS: The effect of the configuration of the dimer structure on the plasmonic response (extinction spectrum) and Raman scattering signal of the dimer nanojunctions

” Horizontal dimers” includes the “face-corner”, “corner-corner”, and “face-face” configurations. The configuration with the strongest electric field is the “corner-corner” configuration, and the one with the weakest electric field is the “face-face” configuration. As shown in supporting information S10 and the literature report,<sup>1</sup> the electric field strength of the “corner-corner” configuration is approximately 1.35 times that of the “face-face” configuration. And the “face-corner” configuration has the electric strength between the “face-face” and “corner-corner” configuration. The difference in electric field strength between different configurations of “horizontal” dimer nanojunctions is not sufficient to cause a significant difference in plasmonic response (extinction spectrum). However, since the Raman scattering signal is highly sensitive to changes in the “electromagnetic field”, this difference in electric field strength between different configurations can lead to significant changes in the intensity of the Raman scattering signal. This makes the “horizontal dimer” (which involved three configurations) have a stronger Raman enhancement factor than the “vertical dimer” (mainly “face-face configuration”).

#### Reference

1. B. Gao, G. Arya and A. R. Tao, Nature Nanotechnology, 2012, 7, 433-437.

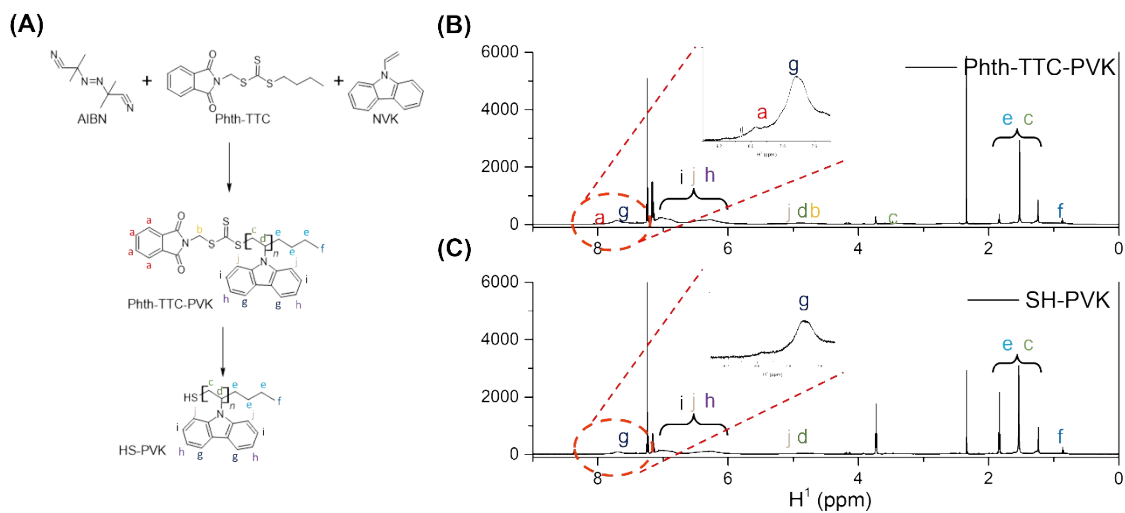

**S10 Synthesized of thiol terminated poly(3,6-N-vinylcarbazole) (HS-PVK) by RAFT polymerization** (A) For the synthesis of HS-PVK, there are two steps involved: RAFT polymerization and thiolation (more detail can be found in experimental section). (B) The nuclear magnetic resonance (NMR) spectrum of Phth-TTC-PVK monomer. (C) The NMR spectrum of HS-PVK. And the relative chemical shift of H<sup>1</sup> resulted from the corresponded chemical structure as shown in (A) and table S7.



Table S7 Chemical vibration modes of Phth-TTC-PVK and HS-PVK in NMR

| Sample       | Symbol | Group                                              | Chemical shift  |
|--------------|--------|----------------------------------------------------|-----------------|
| Phth-TTC-PVK | a      | Benzene of Phth-TTC                                | 8.05            |
|              | b      | N-CH <sub>2</sub> -S                               | 4.5-5.2         |
|              | c      | S-CH <sub>2</sub> -CH                              | 3.47、1.1-2.0    |
|              | d      | S-CH <sub>2</sub> -CH                              | 4.5-5.2         |
|              | e      | R-(CH <sub>2</sub> ) <sub>3</sub> -CH <sub>3</sub> | 1.1-2           |
|              | f      | R-(CH <sub>2</sub> ) <sub>3</sub> -CH <sub>3</sub> | 0.85            |
|              | g      | Benzene of NVK                                     | 7.5-8.0         |
|              | h      |                                                    | 6.0-7.1         |
|              | i      |                                                    | 6.0-7.1         |
|              | j      |                                                    | 4.5-5.2、6.0-7.1 |
| HS-PVK       | c      | S-CH <sub>2</sub> -CH                              | 1.1-2.0         |
|              | d      | S-CH <sub>2</sub> -CH                              | 4.5-5.2         |
|              | e      | R-(CH <sub>2</sub> ) <sub>3</sub> -CH <sub>3</sub> | 1.1-2           |
|              | f      | R-(CH <sub>2</sub> ) <sub>3</sub> -CH <sub>3</sub> | 0.85            |
|              | g      | Benzene of NVK                                     | 7.5-8.0         |
|              | h      |                                                    | 6.0-7.1         |
|              | i      |                                                    | 6.0-7.1         |
|              | j      |                                                    | 4.5-5.2、6.0-7.1 |
